# Supplementary figures and images for: Visible light-induced controlled surface grafting polymerization of hydroxyethyl methacrylate from isopropylthioxanthone semipinacol-terminated organic monolayers
Source: Royal Society of Chemistry journal article supplement (doi:10.1039/d0py01410a), 2021-01-01

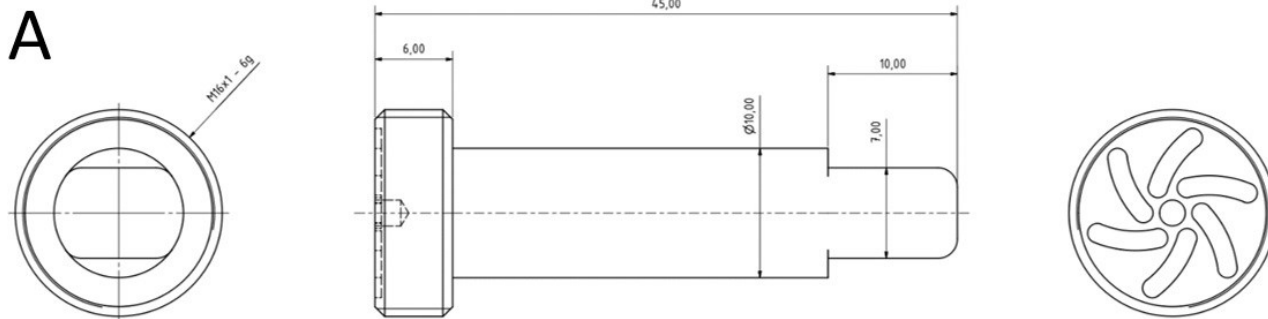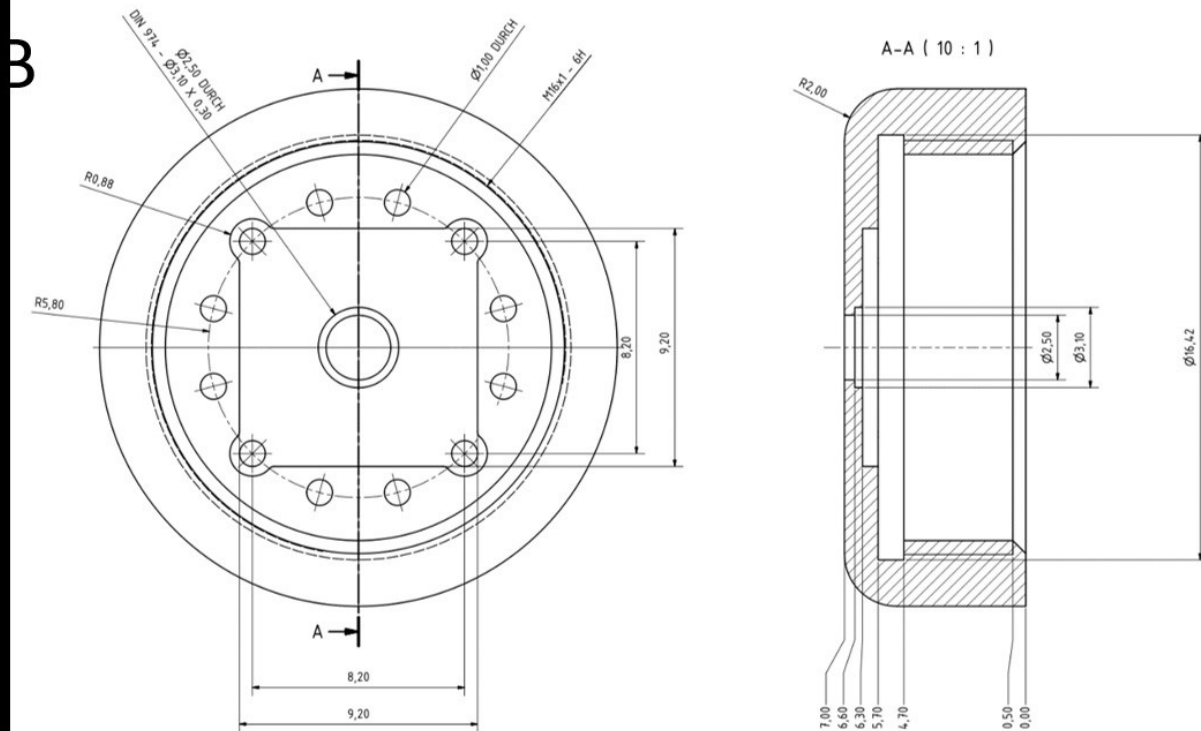

Supplement: d0py01410a3.pdf [file d0py01410a3.pdf]
